# Supplementary material for: A Randomized, Double-Blind, Placebo-Controlled Trial of Ibuprofen Lysinate in Comparison to Ibuprofen Acid for Acute Postoperative Dental Pain
Source: Springer Nature journal article supplement (doi:10.1007/s40122-019-00148-1), 2020-01-07
Supplement: MOESM1 [file 17959084]

## List of Ethic Committees

### Multicentric Ethic Committee

Multicentric Ethical Committee of the University Hospital in Motol, Prague

### Local Ethic Committees

Homolka Hospital Ethic Committee, Prague

University Hospital in Motol Ethic Committee, Prague

General University Hospital in Motol Ethic Committee, Prague

University Hospital in Motol Ethic Committee, Liberec
